# Supplementary material
Source: Elsevier journal article supplement (https://www.sciencedirect.com/science/article/pii/S0213911118302309)
Supplement: mmc1 [file S0213911118302309:mmc1.docx]

**Apéndice A**

**Tabla I**

Listado de publicaciones analizadas en el estudio *Análisis de la producción científica mundial sobre esterilización forzada de mujeres con discapacidad entre 1997 y 2016* a

| **Autoría** | **Título** | **Revista o fuente** | **Volumen, n.º y páginas** | **Año** | **Dimensión** |
| --- | --- | --- | --- | --- | --- |
| Albanese, Asunta & Hopper, Neil | Suppression of menstruation in adolescents with severe learning disabilities | Archives of disease in childhood | 92(7):629-32 | 2007 | 3 |
| American Academy of Pediatrics | Sterilization of minors with developmental disabilities | Pediatrics | 104(2):337-40 | 1999 | 3 |
| American College of Obstetricians and Gynecologists | Sterilization of women, including those with mental disabilities | Obstetrics & Gynecology | 110(1):217-20 | 2007 | 3 |
| Arenas, Miriam | Una mirada interseccional a la violencia contra las mujeres con diversidad funcional | Oñati Socio-legal Series | 5(2):367-88 | 2015 | 1 |
| Areschoug, Judith | Parenthood and intellectual disability: discourses on birth control and parents with intellectual disabilities 1967–2003 | Scandinavian Journal of Disability Research | 7(3-4):155-75 | 2005 | 1 |
| Arnau, María Soledad | Crímenes olvidados. El holocausto y las personas con diversidad funcional | Libro de comunicaciones XI Congreso Nacional de Bioética | p. 462-73 | 2014 | 2 |
| Aronson, Stanley | The right of the stat to sterilize | Medicine and health, Rhode Island | 89(6):193 | 2006 | 1 |
| Associació Dones No Estàndards | Indicadores de exclusión social de mujer con discapacidad | Reporte ADNE, UAB, IMSERSO | 149 p. | 2002 | 2 |
| Aunos, Marjorie & Feldman, Maurice | Attitudes towards sexuality, sterilization and parenting rights of persons with intellectual disabilities | Journal of Applied Research in Intellectual Disabilities | 15(4):285-96 | 2002 | 4 |
| Backeljauw, Philippe; Rose, Susan & Lawson, Margaret | Clinical management of menstruation in adolescent females with developmental delay | The Endocrinologist | 14(2):87-92 | 2004 | 3 |
| Barbuto, Rita & Napolitano, Emilia | Women with disabilities: from discrimination and violence towards an ethics of reciprocity | Modern Italy | 19(2):161-8 | 2014 | 1 |

| Begun, Heather | Empirical analysis of sterilization of mentally handicapped individuals in the united states | Journal of Student Nursing Research | 1(2):13-9 | 2007 | 3 |
| --- | --- | --- | --- | --- | --- |
| Betancourt, Oscar &  Urrego, Oscar | Tengo discapacidad intelectual - Vivo la sexualidad y el erotismo. Estudio de caso sobre discapacidad y sexualidad | Tesis de Maestría en Desarrollo Educativo y Social, Universidad Pedagógica Nacional, Colombia | 95 p. | 2014 | 4 |
| Björnsdóttir, Kristín & Traustadóttir, Rannveig | Stuck in the land of disability? The intersection of learning difficulties, class, gender and religion | Disability & Society | 25(1):49-62 | 2010 | 1 |
| Block, Pamela | Sexuality, parenthood and cognitive disability in Brazil | Sexuality and Disability | 20(1):7-28 | 2002 | 4 |
| Block, Pamela | Sexuality, fertility, and danger: twentieth-century images of women with cognitive disabilities | Sexuality and Disability | 18(4):239-54 | 2000 | 1 |
| Brady, Susan | Sterilisation of girls and women with disabilities: past and present justifications | Violence Against Women | 7(4):432-61 | 2001 | 3 |
| Brady, Susan & Grover, Sonia | The sterilisation of girls and young women in Australia: a legal, medical and social context | Reporte Human Rights and Equality Opportunity Commission | 56 p. | 1997 | 1 |
| Brady, Susan; Briton, John & Grover, Sonia | The sterilisation of girls and young women in Australia: issues and progress | Reporte Human Rights and Equal Opportunity Commission | 55 p. | 2001 | 1 |
| Cabrera, Carlos | Consentimiento informado traslativo. Caso clínico | Revista de Obstetricia y Ginecología de Venezuela | 61(3):201-6 | 2001 | 1 |
| Capewell, Carmel; Ralph, Sue & Bonnett, Liz | The continuing violence towards disabled people | Journal of Research in Special Educational Needs | 15(3):211-21 | 2015 | 2 |
| Caralis, Dena: Kodner, Ira & Douglas, Brown | Permanent sterilization of mentally disabled individuals: A case study | Surgery | 146(5):959-63 | 2009 | 3 |
| Carlson, Licia | Cognitive ableism and disability studies: feminist reflections on the history of mental retardation | Hypatia | 16(4):124-46 | 2001 | 2 |
| Carlson, David & Dorfman, Deborah | lnvestigative report regarding the “Ashley Treatment” | Reporte Washington Protection & Advocacy System | 38 p. | 2007 | 2 |
| Casas, Lidia | La práctica de esterilización en niñas y mujeres competentes y con discapacidad psíquica o intelectual en Chile | Capítulo libro “Informe Anual sobre Derechos Humanos en Chile 2016” | pp. 173-215 | 2016 | 1 |
| Castles, Katherine | Southern Historical Association Quiet Eugenics: Sterilization in North Carolina's Institutions for the Mentally | The Journal of Southern History | 68(4):849-78 | 2002 | 2 |
| Centre for Human Rights & Humanitarian Law | Torture in Healthcare Settings: Reflections on the special rapporteur on torture’s 2013 thematic report | Reporte Centre for Human Rights & Humanitarian Law | 346 p. | 2013 | 1 |
| Cepko, Roberta | Involuntary sterilization of mentally disabled women | Berkeley Journal of Gender Law & Justice | 8(1):122-65 | 2013 | 1 |
| Chou, Yueh-Ching & Lu, Zxy-Yann | Caring for a daughter with intellectual disabilities in managing menstruation: a mother's perspective. | Journal of Intellectual and Developmental Disability | 37(1):1-10 | 2012 | 4 |
| Chou, Yueh-Ching & Lu, Zxy-Yann | Deciding about sterilisation: perspectives from women with an intellectual disability and their families in Taiwan | Journal of Intellectual Disability Research | 55(1):63-74 | 2011 | 4 |
| Comité Español Representantes Personas Con Discapacidad | Derechos Humanos y Discapacidad. Informe España 2014 | Reporte “Convención de la ONU y Derechos Humanos 2015” | 284 p. | 2015 | 1 |
| Conod, Loïse & Servais, Laurent | Sexual life in subjects with intellectual disability | Salud Pública de México | 50(2):230-8 | 2008 | 3 |
| Cook, Rebecca & Dickens, Bernard | Voluntary and involuntary sterilization: Denials and abuses of rights | International Journal of Gynecology & Obstetrics | 68(1):61-7 | 2000 | 1 |
| Cook, Rebecca & Dickens, Bernard | Reducing stigma in reproductive health | International Journal of Gynecology & Obstetrics | 125(1):89-92 | 2014 | 1 |
| Cruz, María | Acceso a derechos sexuales y reproductivos de las mujeres con discapacidad: El papel de las y los prestadores de servicios | Revista Estudios de Género: La Ventana | 5(42):7-45 | 2015 | 1 |
| Cruz, María | Mujeres con discapacidad y su derecho a la sexualidad | Política y Cultura | 22:147-60 | 2004 | 1 |
| Cuskelly, Monica & Bryde, Rachel | Attitudes towards the sexuality of adults with an intellectual disability: parents, support staff, and a community sample | Journal of Intellectual and Developmental Disability | 29(3):255-64 | 2004 | 4 |
| Denekens, Joke; Nys, Herman & Stuer, Hugo | Sterilisation of incompetent mentally handicapped persons: a model for decision making. | Journal of Medical Ethics | 25(3):237-41 | 1999 | 3 |
| Díaz, Elena | La esterilización forzosa y el aborto coercitivo | Capítulo libro “El reflejo de la mujer en el espejo de la discapacidad” | p. 140-9 | 2013 | 1 |
| Dickens, Bernard | Female contraceptive sterilization: FIGO Committee for the ethical aspects of human reproduction and women's health | International Journal of Gynecology and Obstetrics | 115(1):88-9 | 2011 | 3 |
| Diekema, Douglas | Involuntary sterilization of persons with mental retardation: An ethical analysis | Mental Retardation and Developmental Disabilities Research Reviews | 9(1):21-6 | 2003 | 3 |
| Diekema, Douglas & Fost, Norman | Ashley revisited: a response to the critics | The American journal of bioethics: AJOB | 10(1):30-44 | 2010 | 3 |
| Dizon, Christine; Allen, Lisa & Ornstein, Melanie | Menstrual and contraceptive issues among young women with developmental delay: a retrospective review of cases at the hospital for sick children, Toronto | Journal of Pediatric and Adolescent Gynecology | 18(3):157-62 | 2005 | 3 |
| Dowse, Leanne & Frohmader, Carolyn | Sterilisation and reproductive health of women and girls with disabilities | Reporte Women With Disabilities Australia | 111 p. | 2001 | 1 |
| Earle, Sarah; Chapman, Rohhss; Ledger, Sue et al. | Contraceptive choices for women with learning disabilities | Reporte Open Society Foundations | 66 p. | 2015 | 4 |
| Eastgate, Gillian | Sexual health for people with intellectual disability | Salud Pública de México | 50(1):s255-9 | 2008 | 1 |
| Emile, Karlyn | Intellectual disability and sexual health | International Journal of Interdisciplinary Studies in Business, Technology, and Education | 1(1):1-21 | 2013 | 4 |
| Esparza, Carlos | La esterilización de los incapaces | Revista Pediatría de Atención Primaria | 4(14):301-9 | 2002 | 3 |
| Fasouliotis, Sozos & Schenker, Joseph | Voluntary and involuntary sterilization: medical, ethical, legal and religious aspects | Ginekologia polska | 70(8):558-72 | 1999 | 3 |
| Fernández, Mariela & Moraga, Francisco | Esterilización quirúrgica en discapacitadas mentales | Revista Obstetricia y Ginecología | 7(3):174-80 | 2012 | 3 |
| Frohmader, Carolyn | Violence against women with disabilities | Reporte Women With Disabilities Australia | 4 p. | 2014 | 1 |
| Frohmader, Carolyn | The sexual and reproductive rights of women and girls with disabilities | Conferencia Women With Disabilities Australia | 17 p. | 2014 | 1 |
| Frohmader, Carolyn | Dehumanised: The forced sterilisation of women and girls with disabilities in Australia | Reporte Women With Disabilities Australia | 114 p. | 2013 | 1 |
| Frohmader, Carolyn | Sterilisation of women and girls with disabilities: an update on the issue in Australia | Reporte Women With Disabilities Australia | 11 p. | 2011 | 1 |
| Frohmader, Carolyn | Moving forward and gaining ground: The sterilization of women and girls with disabilities in Australia | Reporte Women With Disabilities Australia | 26 p. | 2012 | 1 |
| Frohmader, Carolyn | Women With Disabilities Australia | Reporte Women With Disabilities Australia | 39 p. | 2014 | 1 |
| Frohmader, Carolyn; Dowse, Leanne & Didi, Aminath | Preventing violence against women and girls with disabilities: integrating a human rights perspective | Reporte Women With Disabilities Australia | 36 p. | 2015 | 1 |
| Giami, Alain | Sterilisation and sexuality in the mentally handicapped | European Psychiatry | 13:113s-9s | 1998 | 1 |
| Gil, Isabela | La esterilización de personas incapacitadas por enfermedad mental: Una puerta a la desigualdad y la discriminación | Tesis de Doctorado Cs. Salud, Universidad Católica San Antonio, España | 302 p. | 2015 | 1 |
| Gilmore, Linda & Malcolm, Laura | “Best for everyone concerned” or “Only as a last resort”? Views of Australian doctors about sterilisation of men and women with intellectual disability | Journal of Intellectual and Developmental Disability | 39(2):177-87 | 2014 | 1 |
| Goldman, Edward & Quint, Elisabeth | Arguments against sterilization of developmentally disabled minors | Journal of Child Neurology | 26(5):654-6 | 2011 | 3 |
| Gómez, Laura; Alcedo, María; Fontanil, Yolanda et al. | Violencia en mujeres con discapacidad intelectual | Capítulo libro “Análisis interdisciplinar de la violencia de género” | p. 105-14 | 2013 | 1 |
| Greenwood, Nachama & Wilkinson, Joanne | Sexual and reproductive health care for women with intellectual disabilities: A primary care perspective | International Journal of Family Medicine | 2013(ID 642472):1-8 | 2013 | 1 |
| Grekul, Jana | Sterilization in Alberta: 1928 To 1972: Gender Matters | Canadian Review of Sociology | 45(3):247-66 | 2008 | 2 |
| Grover, Sonia | Menstrual and contraceptive management in women with an intellectual disability | The Medical Journal of Australia | 176:108-10 | 2002 | 3 |
| Grover, Sonia; Brady, Susan & Chondros, Patty | Sterilisations in girls and young women: ¿is it still happening? | Australian and New Zealand Journal of Public Health | 26(3):273-5 | 2002 | 3 |
| Gunther, Daniel & Diekema, Douglas | Attenuating growth in children with profound developmental disability | Archives of Pediatrics & Adolescent Medicine | 160(10):1013-7 | 2006 | 3 |
| Hamilton, Carol | Sterilization and intellectually disabled people in New Zealand: rights, responsibility and wise counsel needed | Kōtuitui: New Zealand Journal of Social Sciences Online | 10(1):36-45 | 2014 | 3 |
| Hamilton, Carol | Community members’ responses to the elective hysterectomy of an intellectually disabled girl | Journal of Social Inclusion | 2(1):23-38 | 2011 | 1 |
| Holness, Willene | Informed consent for sterilisation of women and girls with disabilities in the light of the Convention on the Rights of Persons with Disabilities | Agenda. Empowering women for gender equity | 27(4):35-54 | 2013 | 1 |
| Howard, Ruth & Hendy, Steve | The sterilisation of women with learning disabilities – some points for consideration | The British Journal of Development Disabilities | 50(99):133-41 | 2004 | 3 |
| Iglesias, Marita; Gil, Gema; Joneken, Anneli et al. | Violencia y mujer con discapacidad | Reporte Proyecto METIS, iniciativa DAPHNE de la Unión Europea | 27 p. | 1998 | 1 |
| Insogna, Iris & Fiester, Autumn | Sterilization as last resort in women with intellectual disabilities: ¿ptection or disservice? | American Journal of Obstetrics and Gynecology | 212(1):34-6.e1 | 2015 | 3 |
| International Network of Women With Disabilities | Document on violence | Reporte International Network of women with disabilities | 18 p. | 2010 | 1 |
| Jewell, Paul | Policy as ethics: sterilisation of girls with intellectual disability | Policy and Society | 26(3):49-64 | 2007 | 1 |
| Jones, Melinda & Marks, Lee | Female and Disabled: A human rights perspective on law and medicine | Capítulo libro “Intersections: Women on Law, Medicine and Technology” | pp. 49-71 | 1997 | 3 |
| Jones, Linda; Binger, Tara; McKenzie, Christine et al. | Sexuality, pregnancy and midwifery care for women with intellectual disabilities: A pilot study on attitudes of university students | Contemporary Nurse | 35(1):47-57 | 2010 | 4 |
| Karsay, Dorottya & Lewis, Oliver | Disability, torture and ill-treatment: Taking stock and ending abuses | The International Journal of Human Rights | 16(6):816-30 | 2012 | 1 |
| Katalinić, Sanja; Šendula-Jengić, Vesna; Šendula-Pavelić, Martina et al. | Reproductive rights of mentally retarded persons | Psychiatria Danubina | 24(1):38-43 | 2012 | 1 |
| Kramers-Olen, Anne | Sexuality, intellectual disability, and human rights legislation | South African Journal of Psychology | 46(4):504-16 | 2016 | 1 |
| Lantos, John | It’s not the growth attenuation, it’s commentaries the sterilization! | The American Journal of Bioethics | 10(1):45-6 | 2010 | 2 |
| Ledger, Susan; Earle, Sarah; Tilley, Elizabeth et al. | Contraceptive decision-making and women with learning disabilities | Sexualities | 19(5-6):698-724 | 2016 | 1 |
| Lee, Kira; Devine, Alexandra; Marco, Ma. Jesusa et al. | Sexual and reproductive health services for women with disability: a qualitative study with service providers in the Philippines | BMC Women's Health | 15(1):87 | 2015 | 1 |
| McCarthy, Michelle | ‘I have the jab so I can't be blamed for getting pregnant’: Contraception and women with learning disabilities | Women's Studies International Forum | 32:198-208 | 2009 | 1 |
| McCarthy, Michelle | Prescribing contraception to women with intellectual disabilities: General practitioners' attitudes and practices | Sexuality and Disability | 29(4):339-49 | 2011 | 1 |
| Montes, Maribel | Discapacidad: un estado de la cuestión desde la bioética | REVISALUD Unisucre | 2(2):46-60 | 2015 | 1 |
| Moya, Asunción | La sexualidad en mujeres con discapacidad. Perfil de su doble discriminación | Feminismos/s | 13:133-52 | 2009 | 1 |
| Muñoz, María & Lucero, Boris | Aspectos legales y bioéticos de intervenciones e investigaciones en personas con discapacidad intelectual en Chile | Acta Bioethica | 20(1):61-70 | 2014 | 1 |
| Murúa, Fabián | El derecho a la toma de decisiones en materia de salud sexual de las mujeres con discapacidad desde la óptica de la violencia y la opresión de grupo; algunos avances en C.A.B.A. | Derecho y Ciencias Sociales | 12:116-30 | 2015 | 1 |
| Naidu, ﻿Ereshnee; ﻿  Haffejee, ﻿Sadiyya;  Vetten, Lisa et al. | On the margins: Violence against women with disabilities | Reporte Centre for the Study of Violence and Reconciliation | 48 p. | 2005 | 1 |
| Nowak, Manfred | Promotion and protection of all human rights, civil, political, economic, social and cultural rights, including the right to development | Reporte Naciones Unidas | 27 p. | 2008 | 1 |
| O'Brien, Gerald | Anchors on the ship of progress and weeds in the human garden: Objectivist rhetoric in American eugenic writings | Disability Studies Quarterly | 31(3):1-25 | 2011 | 1 |
| OHCR, UN Women, UNAIDS et al. | Eliminating forced, coercive and otherwise involuntary sterilization. An interagency statement | Libro World Health Organization | 36 p. | 2014 | 1 |
| Olavarrieta, Sara; Darín, Lucía; Suárez, Patricia et al. | Actitudes hacia la sexualidad, esterilización, maternidad/paternidad y habilidades de crianza de personas con discapacidad intelectual: un estudio preliminar | Revista Siglo Cero | 44(4)(248):55-69 | 2013 | 4 |
| Open Society Foundations | Against her will forced and coerced sterilization of women worldwide | Reporte Open Society Foundations | 12 p. | 2011 | 1 |
| Paransky, Ora & Zurawin, Robert | Management of menstrual problems and contraception in adolescents with mental retardation: A medical, legal, and ethical review with new suggested guidelines | Journal of Pediatric and Adolescent Gynecology | 16(4):223-35 | 2003 | 3 |
| Parchomiuk, Monika | Specialists and sexuality of individuals with disability | Sexuality and Disability | 30(4):407-19 | 2012 | 4 |
| Park, Deborah & Radford, John | From the case files: Reconstructing a history of involuntary sterilisation | Disability & Society | 13(3):317-42 | 1998 | 1 |
| Peláez, Ana | Esterilización forzada de niñas y mujeres con discapacidad | Capítulo libro “Maternidad y Discapacidad” | p. 57-70 | 2009 | 1 |
| Pham, Hoangmai & Lerner, Barron | ¿In the patient’s best interest? Revisiting sexual autonomy and sterilization of the developmentally disabled | Western Journal of Medicine | 175(4):280-3 | 2001 | 1 |
| Pollack, Daniel | The capacity of a mentally challenged person to consent to abortion and sterilization | Health & Social Work | 30(3):253-7 | 2005 | 1 |
| Radtke, Dinah; Barbuto, Rita; Naplitano, Emilia et al. | Violence means death of the soul | Reporte Disabled People's International Italia | 22 p. | 2000 | 1 |
| Reed, Elizabeth | Criminal law and the capacity of mentally retarded persons to consent to sexual activity | Virginia Law Review | 83(4):799-827 | 1997 | 2 |
| Romañach, Javier & Arnau, Soledad | La visión de la eugenesia desde la dignidad en la diversidad funcional | Conferencia XVI Congreso Valenciano de Filosofía | p. 327-43 | 2006 | 2 |
| Rowlands, Sam | Learning disability and contraceptive decision-making | Journal of Family Planning and Reproductive Health Care | 37(3):173-8 | 2011 | 3 |
| Roy, Meera | A case note follow-up of women with intellectual disability referred for sterilization | Journal of Intellectual Disabilities | 14(1):43-52 | 2010 | 1 |
| Roy, Ashwin; Roy, Ameeta & Roy, Meera | The human rights of women with intellectual disability | Journal of the Royal Society of Medicine | 105(9):384-9 | 2012 | 1 |
| Rueda, Gabriela & Albuquerque, Aline | Esterilización involuntaria y forzada en Colombia: Desafío social para la bioética | Anamnesis Revista de Bioética | 10:27-43 | 2015 | 1 |
| Russell, Paul | Sterilization of intellectually disabled minors | Reporte Comitte of Attorneys General | 9 p. | 2006 | 3 |
| Savell, Kristin | Sex and the sacred: Sterilization and bodily integrity in English and Canadian law | McGill Law Journal | 49:1093-141 | 2004 | 2 |
| Serra, María | La esterilización forzosa y/o involuntaria en la mujer con discapacidad intelectual: análisis desde una perspectiva de derechos humanos | Tesis de Máster Oficial en Estudios Avanzados en Derechos Humanos, Universidad Carlos III de Madrid, España | 116 p. | 2015 | 2 |
| Serra, María | ¿Paternalismo o restricción de autonomía? Esterilización forzosa a personas con discapacidad | Conferencia Congreso "El tiempo de los derechos. Los DDHH en el siglo XXI" | 19 p. | 2014 | 1 |
| Serra, María | Feminismos y discapacidad | Derechos y libertades | (31):251-72 | 2014 | 2 |
| Servais, Laurent; Jacques, Denis  Leach, Robert et al. | Contraception of women with intellectual disability: prevalence and determinants | Journal of Intellectual Disability Research | 46(2):108-19 | 2002 | 1 |
| Servais, Laurent  Leach, Robert  Jacques, Denis et al. | Sterilisation of intellectually disabled women | European Psychiatry | 19(7):428-32 | 2004 | 3 |
| Servais, Laurent | Sexual health care in persons with intellectual disabilities | Mental Retardation and Developmental Disabilities Research Reviews | 12(1):48-56 | 2006 | 2 |
| Sifris, Ronli | The involuntary sterilisation of marginalised women: power, discrimination, and intersectionality | Griffith Law Review | 25(1):45-70 | 2016 | 1 |
| Sifris, Ronli | Conceptualising involuntary sterilisation as severe pain or suffering for the purposes of torture discourse | Netherlands Quarterly of Human Rights | 28(4):523-47 | 2010 | 1 |
| Sifris, Ronli | Reproductive freedom, torture and international human rights: Challenging the masculinisation of torture | Libro editorial Routledge | 312 p. | 2014 | 1 |
| Smith, Phil | Health care, euthanasia, limiting growth, and sterilization: ¿what do they mean for disability studies? | Disability Studies Quarterly | 27(1/2):1-4 | 2007 | 1 |
| Sowa, Nathaniel & Rosenstein, Donald | Medically necessary sterilization of a minor with intellectual disability: a case report and historical perspective | North Carolina Medical Journal | 76(1):59-63 | 2015 | 3 |
| Spicer, Cathy | Sterilisation of women and girls with disabilities – A literature review | Revisión Women With Disabilities Australia | 4 p. | 1999 | 3 |
| Stansfield, Alison; Holland, Anthony &  Clare, Isabel | The sterilisation of people with intellectual disabilities in England and Wales during the period 1988 to 1999 | Journal of Intellectual Disability Research | 51(8):569-79 | 2007 | 3 |
| Steele, Linda | Disability, abnormality and criminal law: Sterilisation as lawful and “good” violence. | Griffith Law Review | 23(3):467-97 | 2014 | 3 |
| Stefánsdóttir, ﻿Guðrún | Sterilisation and women with intellectual disability in Iceland | Journal of Intellectual and Developmental Disability | 39(2):188-97 | 2014 | 1 |
| Stern, Alexandra | Sterilized in the name of public health: Race, immigration, and reproductive control in modern California | American Journal of Public Health | 95(7):1128-38 | 2005 | 2 |
| Stubblefield, Anna | Beyond the pale: tainted whiteness, cognitive disability, and eugenic sterilization | Hypatia | 22(2):162-81 | 2007 | 2 |
| Tardón, María | Mujeres con discapacidad y violencia de género | Conferencia IV Congreso del Observatorio contra la violencia doméstica y de género | 13 p. | 2010 | 1 |
| Taylor, Miriam; Carlson, Glenys & Van Dooren, Kate | Practical approaches to supporting young women with intellectual disabilities and high support needs with their menstruation | Health Care for Women International | 33(8):678-94 | 2012 | 1 |
| Tilley, Christine | Health care for women with physical disabilities: literature review and theory | Sexuality and Disability | 16(2):87-102 | 1998 | 2 |
| Tilley, Elizabeth; Walmsley, Jan; Earle, Sarah et al | International perspectives on the sterilization of women with intellectual disabilities | Capítulo libro “Understanding Reproductive Loss: Perspectives on Life, Death and Fertility” | p. 23-36 | 2012 | 2 |
| Tilley, Elizabeth; Earle, Sarah; Walmsley, Jan et al. | ‘The silence is roaring’: sterilization, reproductive rights and women with intellectual disabilities | Disability & Society | 27(3):413-26 | 2012 | 2 |
| Tobin, John & Luke, Elliot | The involuntary, non-therapeutic sterilisation of women and girls with an intellectual disability - Can it ever be justified? | Victoria University Law and Justice Journal | 3(698):1-33 | 2013 | 3 |
| Tsuchiya, Takashi | Eugenic sterilizations in Japan and recent demands for apology: A report | Newsletter of the Network on Ethics and Intellectual Disability | 3(1):1-4 | 1997 | 1 |
| Villarino, Pilar | La no discriminación de las mujeres y niñas con discapacidad en la legislación española | Capítulo libro “2003-2012: 10 años de legislación sobre no discriminación de personas con discapacidad en España” | p. 210-43 | 2012 | 1 |
| Walmsley, Jan; Earle, Sarah; Tilley, Elizabeth et al. | The experiences of women with learning disabilities on contraception choice | Primary Health Care | 26(9):28-32 | 2016 | 1 |
| Weisleder, Pedro | Sterilization for individuals with mental disabilities: the other half of the equation | Journal of Child Neurology | 26(5):649-50 | 2011 | 3 |
| Zampas, Christina & Lamačková, Adriana | Forced and coerced sterilization of women in Europe | International Journal of Gynecology and Obstetrics | 114(2):163-6 | 2011 | 1 |
| Zurawin, Robert & Paransky, Ora | The Role of Surgical Techniques in the Treatment of Menstrual Problems and as Contraception in Adolescents with Disabilities | Journal of Pediatric and Adolescent Gynecology | 16(1):51-4 | 2003 | 3 |

aLas 139 referencias se detallan y clasifican según dimensión. Las dimensiones se han distinguido de la siguiente manera:

1: Denuncia de la esterilización forzada como vulneración de derechos humanos.

2: Evidencia histórica de violencia hacia mujeres con discapacidad.

3: Aceptación de la práctica como prestación de salud.

4: Análisis de barreras actitudinales.
